# Supplementary material
Source: Royal Society of Chemistry journal article supplement (https://www.rsc.org/suppdata/dt/1998/1805/d800535.doc)
Supplement: Supplementary file 1 [file d800535.doc]

Table 1: Average Out-of-Plane Displacements, Dihedral Angles between least square

planes for [RuII(DPP)(CO)py], [OsII(DPP)(CO)py] and [RuIV(DPP)(pz)2].

|  | [RuII(DPP)(CO)py] | [OsII(DPP)(CO)py] | [RuIV(DPP)(pz)2] |
| --- | --- | --- | --- |
|  |  |  |  |
| Displacement (Å) a |  |  |  |
|  |  |  |  |
| M (Ru, Os) | +0.1006 | +0.0792 | -0.0390 |
| N1,3 | +0.0767 | +0.0724 | +0.0659 |
| N2,4 | -0.0926 | -0.0679 | -0.0679 |
| C | +0.4561 | 0.4419 | 0.3790 |
| C’ | +0.1316 | 0.1033 |  |
| C | 0.8895 | 0.8811 | 1.0597 |
| C’ | 0.6488 | 0.6570 |  |
|  |  |  |  |
|  |  |  |  |
| Planes (deg) |  |  |  |
|  |  |  |  |
| Pyrrole twist b | 20.93 | 21.03 | 27.78 |
| Pyrrole phenyl twist c | 75.5 | 75.64 | 66.95 |
| Meso phenyl twist d | 66.48 | 67.58 | 49.21 |
| Pyrrole planarity e | <0.05 | <0.05 | <0.05 |
|  |  |  |  |

a: From the least square plane of 25 core atoms

b: Dihedral angle between the least square plane of a pyrrole ring and the least square plane

of the four nitrogen atoms

c: Dihedral angle between the least square planes of the pyrrole and phenyl rings

d: Dihedral angles between the least square plane of a meso phenyl ring and the least square

plane of the meso carbon atoms

e: Largest deviation of any atom in a pyrrole ring from the least square plane of the pyrrole

ring
